# Supplementary material for: Stormy weather: a retrospective analysis of demand for emergency medical services during epidemic thunderstorm asthma
Source: PubMed Central journal article supplement — BMJ. 2017 Dec 13;359:j5636. doi: 10.1136/bmj.j5636 (PMC5727436; doi:10.1136/bmj.j5636), 2017-12-13
Supplement: ande042004.ww1.pdf [file ande042004.ww1.pdf]

**Online Supplementary Appendix**

**Stormy weather: a retrospective analysis of  
demand for emergency medical services  
during epidemic thunderstorm asthma**

**Emily Andrew, Ziad Nehme, Stephen Bernard, Michael J Abramson, Ed Newbiggin, Ben Piper, Justin  
Dunlop, Paul Holman, Karen Smith**

**Table S1: Characteristics of out-of-hospital cardiac arrest patients attended by an emergency ambulance between 6pm and midnight on Mondays**

|                                               | Thunderstorm asthma period (n=17) | Comparator period (n=15) | p-value | RR (95% CI)      |
|-----------------------------------------------|-----------------------------------|--------------------------|---------|------------------|
| <b>Age (years), mean (SD)</b>                 | 48.2 (20.6)                       | 61.3 (23.4)              | 0.1     | -                |
| <b>Age (years), n (%)</b>                     |                                   |                          |         |                  |
| 0-14                                          | 0                                 | 0                        | -       | -                |
| 15-30                                         | 4 (23.5)                          | 1 (7.1)                  | 0.3     | 3.29 (0.41-26.2) |
| 31-50                                         | 6 (35.3)                          | 5 (35.7)                 | 0.98    | 0.99 (0.38-2.56) |
| 51-70                                         | 5 (29.4)                          | 3 (21.4)                 | 0.7     | 1.37 (0.40-4.76) |
| ≥71                                           | 2 (11.8)                          | 5 (35.7)                 | 0.2     | 0.33 (0.08-1.44) |
| <b>Male gender, n (%)</b>                     | 13 (76.5)                         | 9 (60.0)                 | 0.5     | 1.27 (0.78-2.08) |
| <b>Pre-existing medical conditions, n (%)</b> |                                   |                          |         |                  |
| Asthma                                        | 8 (57.1)                          | 3 (23.1)                 | 0.1     | 2.48 (0.83-7.37) |
| Other respiratory                             | 0                                 | 1 (7.7)                  | 0.5     | -                |
| <b>Current asthma medications, n (%)</b>      |                                   |                          |         |                  |
| Anti-inflammatory                             | 0                                 | 0                        | -       | -                |
| Bronchodilator                                | 6 (54.6)                          | 0                        | 0.003   | -                |
| Both                                          | 0                                 | 1 (7.7)                  | 0.5     | -                |
| <b>Aetiology, n (%)</b>                       |                                   |                          |         |                  |
| Cardiac                                       | 6 (35.3)                          | 9 (60.0)                 | 0.2     | 0.59 (0.27-1.26) |
| Respiratory                                   | 9 (52.9)                          | 0                        | 0.001   | -                |
| <b>Witnessed to arrest</b>                    |                                   |                          |         |                  |
| By EMS                                        | 3 (17.7)                          | 3 (20.0)                 | 1.0     | 0.88 (0.21-3.73) |
| By bystander                                  | 11 (64.7)                         | 8 (53.3)                 | 0.7     | 1.21 (0.67-2.19) |
| <b>Bystander CPR, n (%)</b>                   | 9 (52.9)                          | 5 (33.3)                 | 0.3     | 1.59 (0.68-3.70) |
| <b>Initial arrest rhythm</b>                  |                                   |                          |         |                  |
| VF/VT                                         | 4 (23.5)                          | 6 (40.0)                 | 0.5     | 0.59 (0.20-1.69) |
| PEA                                           | 5 (29.4)                          | 3 (20.0)                 | 0.7     | 1.47 (0.42-5.14) |
| Asystole                                      | 7 (41.2)                          | 6 (40.0)                 | 1.0     | 1.03 (0.44-2.39) |
| <b>EMS attempted resuscitation, n (%)</b>     | 13 (76.5)                         | 10 (66.7)                | 0.7     | 1.15 (0.74-1.80) |
| <b>Transported to hospital, n (%)</b>         | 10 (58.8)                         | 6 (40.0)                 | 0.3     | 1.47 (0.70-3.07) |
| <b>Discharged alive, n (%)</b>                | 4 (25.0)                          | 1 (7.7)                  | 0.3     | 3.25 (0.41-25.6) |

Thunderstorm asthma period included 6pm-11:59pm on 21/11/2016; comparator period included 6pm-11:59pm on the three previous Mondays. Proportions exclude missing data. Abbreviations: RR, risk ratio; CI, confidence interval; SD, standard deviation; EMS, emergency medical services; CPR, cardiopulmonary resuscitation; VF/VT, ventricular fibrillation/ventricular tachycardia; PEA, pulseless electrical activity.

**Table S2: Characteristics of patients with paramedic-assessed acute respiratory distress attended by an emergency ambulance between 6pm and midnight on Mondays**

|                                                               | Thunderstorm asthma period (n=291) | Comparator period (n=43) | p-value | RR (95% CI)      |
|---------------------------------------------------------------|------------------------------------|--------------------------|---------|------------------|
| <b>Age (years), mean (SD)</b>                                 | 42.1 (20.2)                        | 59.7 (30.0)              | <0.001  | -                |
| <b>Age (years), n (%)</b>                                     |                                    |                          |         |                  |
| 0-14                                                          | 27 (9.3)                           | 5 (11.6)                 | 0.6     | 0.80 (0.33-1.97) |
| 15-30                                                         | 50 (17.2)                          | 5 (11.6)                 | 0.4     | 1.48 (0.63-3.51) |
| 31-50                                                         | 130 (44.8)                         | 4 (9.3)                  | <0.001  | 4.82 (1.88-12.4) |
| 51-70                                                         | 58 (20.0)                          | 10 (23.3)                | 0.6     | 0.86 (0.48-1.55) |
| ≥71                                                           | 25 (8.6)                           | 19 (44.2)                | <0.001  | 0.20 (0.12-0.32) |
| <b>Male gender, n (%)</b>                                     | 149 (51.4)                         | 21 (48.8)                | 0.8     | 1.05 (0.76-1.46) |
| <b>Pre-existing medical conditions, n (%)</b>                 |                                    |                          |         |                  |
| Asthma                                                        | 191 (65.6)                         | 16 (37.2)                | <0.001  | 1.76 (1.19-2.62) |
| Other respiratory                                             | 18 (6.2)                           | 7 (16.3)                 | 0.019   | 0.38 (0.17-0.86) |
| <b>Current asthma medications, n (%)</b>                      |                                    |                          |         |                  |
| Anti-inflammatory                                             | 6 (2.1)                            | 1 (2.3)                  | 1.0     | 0.91 (0.11-7.34) |
| Bronchodilator                                                | 125 (43.9)                         | 8 (18.6)                 | 0.002   | 2.36 (1.24-4.47) |
| Both                                                          | 54 (18.9)                          | 11 (25.6)                | 0.3     | 0.74 (0.42-1.30) |
| <b>Dispatch priority, n (%)</b>                               |                                    |                          |         |                  |
| Time critical                                                 | 282 (96.9)                         | 25 (58.1)                | <0.001  | 1.67 (1.29-2.15) |
| Acute but not time critical                                   | 9 (3.1)                            | 16 (37.2)                | <0.001  | 0.08 (0.04-0.18) |
| Non-acute                                                     | 0                                  | 2 (4.7)                  | 0.016   | -                |
| <b>Breathing problems identified in emergency call, n (%)</b> | 249 (85.6)                         | 34 (79.1)                | 0.3     | 1.08 (0.92-1.27) |
| <b>Transported to hospital, n (%)</b>                         | 236 (81.1)                         | 38 (88.4)                | 0.2     | 0.92 (0.81-1.04) |

Thunderstorm asthma period includes 6pm-11:59pm on 21/11/2016; comparator period includes 6pm-11:59pm on the three previous Mondays. Proportions exclude missing data. Abbreviations: RR, risk ratio; CI, confidence interval; SD, standard deviation; OHCA, out-of-hospital cardiac arrest.

**Figure S1: Immediate and cumulative effect of the thunderstorm asthma event on EMS caseload**

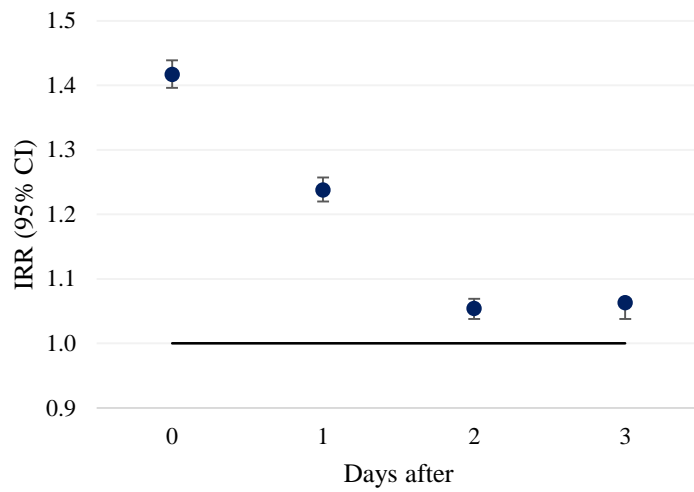

Abbreviations: IRR, incident rate ratio; CI, confidence interval.

**Figure S2: Daily volume of breathing problem presentations**

**A: Breathing problems identified in the emergency phone call**

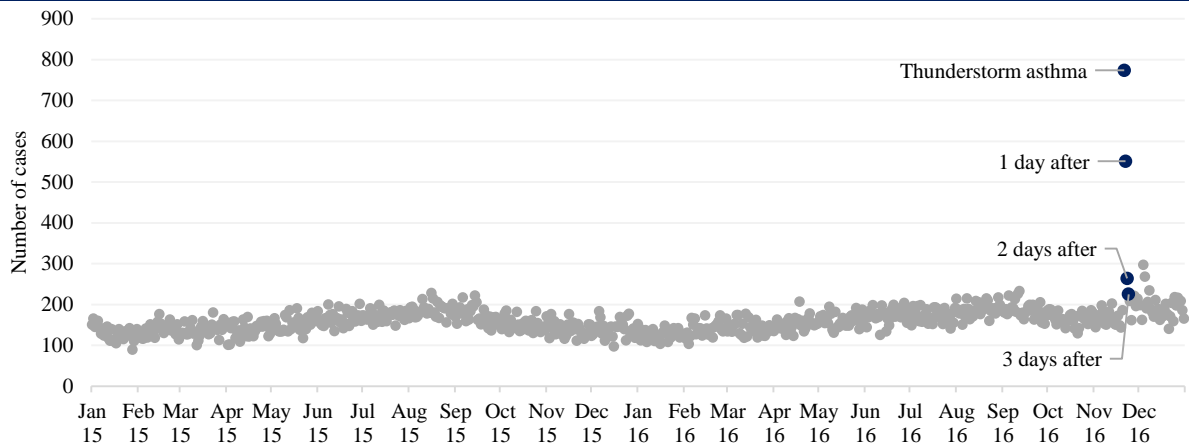

**B: Paramedic assessment of acute respiratory distress**

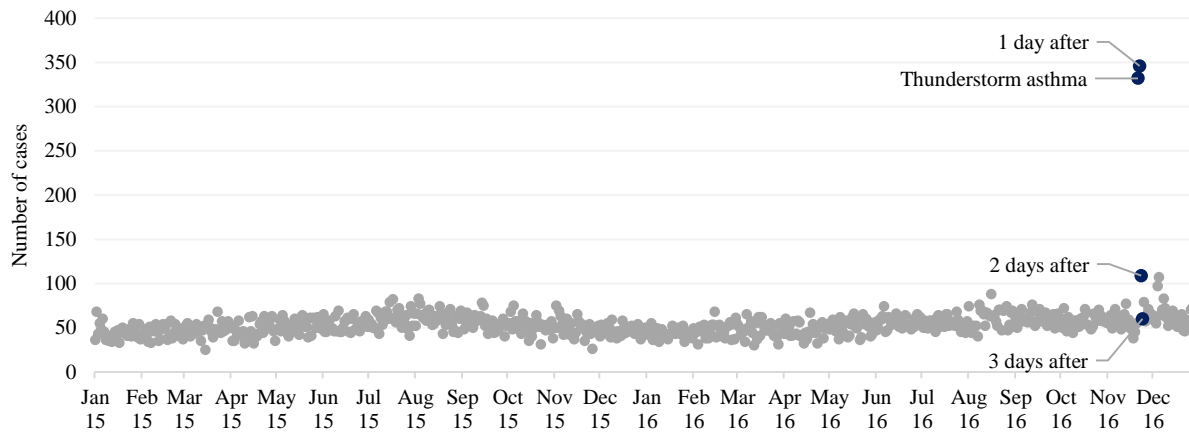

**Figure S3: Immediate and cumulative effect of the thunderstorm asthma event on breathing problem presentations**

**A: Breathing problems identified in the emergency phone call**

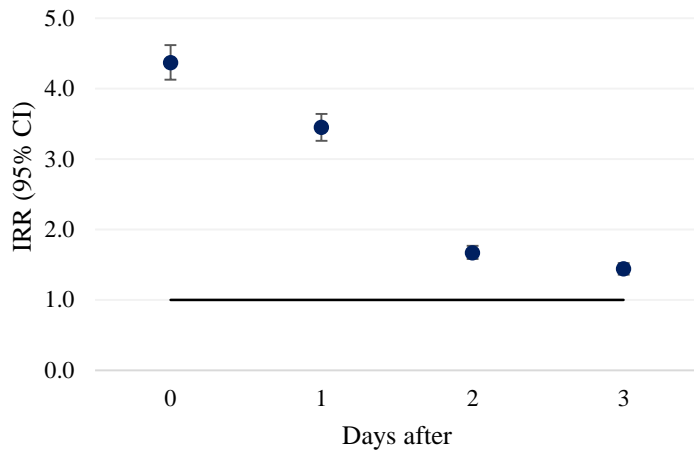

**B: Paramedic assessment of acute respiratory distress**

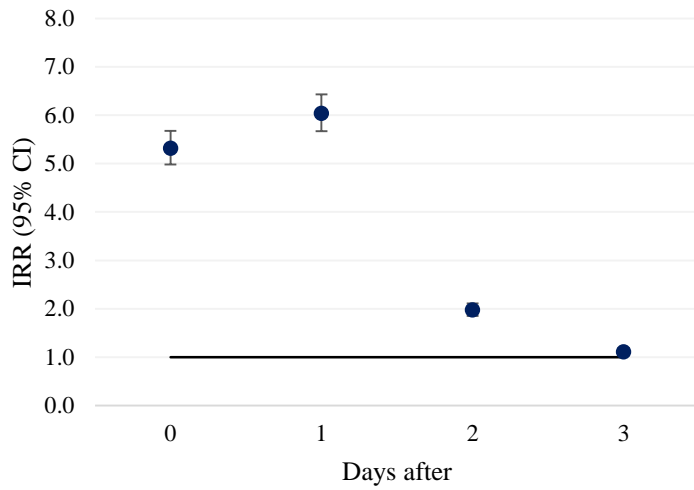

Abbreviations: IRR, incident rate ratio; CI, confidence interval.

**Figure S4: Immediate effect of thunderstorm asthma across Local Government Areas in Victoria**

**A: State of Victoria**

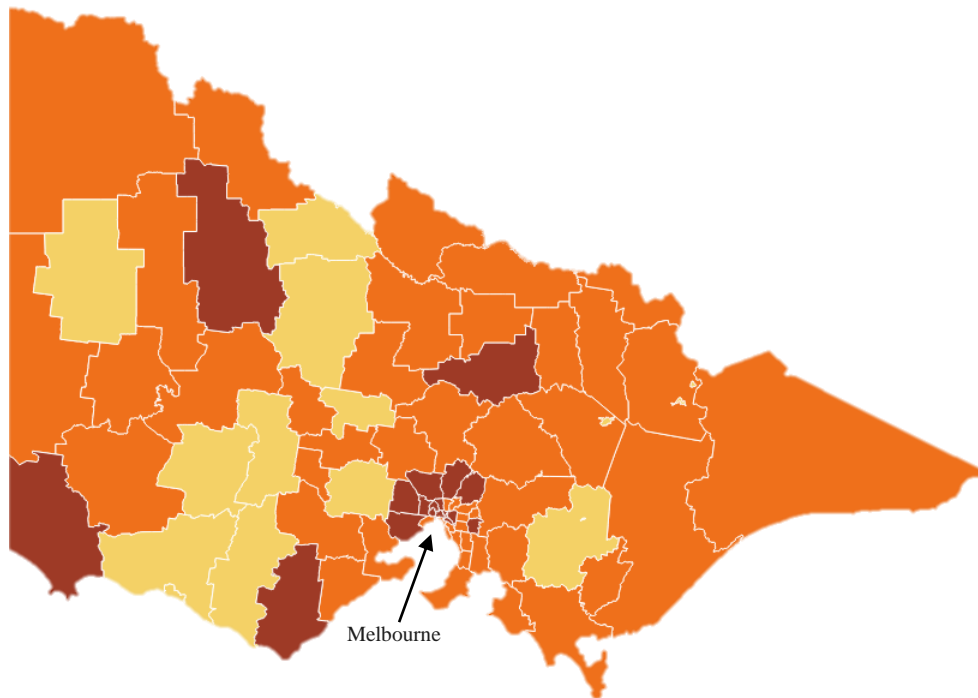

**B: Capital city of Melbourne (zoomed in from above)**

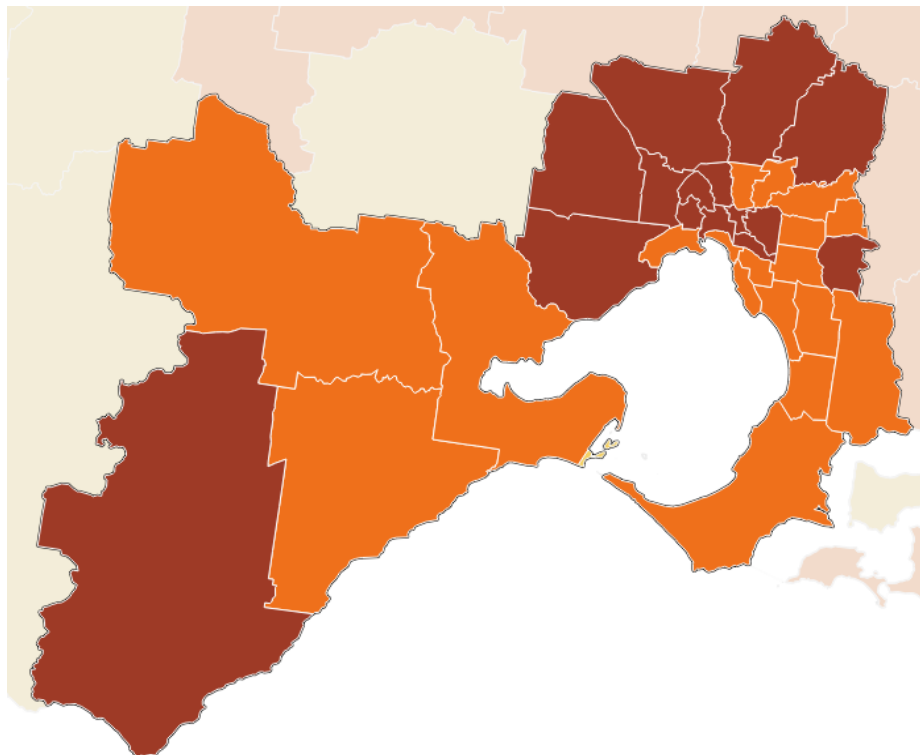

Legend: Yellow,  $IRR \leq 0.99$ ; Orange,  $IRR = 1.00-1.69$ ; Red,  $IRR \geq 1.70$ . Abbreviations: IRR, incident rate ratio. IRR categories are based on the average IRR+2 standard deviations across the state, excluding Thunderstorm Asthma (average IRR=0.99, 2 standard deviations=0.67). Areas outside Melbourne with  $IRR \geq 1.70$  include small samples and should be interpreted with caution.
